# Supplementary material
Source: PubMed Central journal article supplement (PMC5571250)
Supplement: JVI.00630-17_zjv999182863s1.pdf [file JVI.00630-17_zjv999182863s1.pdf]

**Table S1. Publicly available genomes of coxsackievirus types A16 and A10 used in the study.**

| <b>Serotype</b> | <b>Accession number</b> | <b>Strain designation</b> | <b>Geographic origin</b> | <b>Isolation year</b> |
|-----------------|-------------------------|---------------------------|--------------------------|-----------------------|
| CVA16A          | CAU05876                | G10                       | ZAF                      | 1951                  |
| CVA16B          | JN674176                | HN1662                    | CHN                      | 2010                  |
| CVA16B          | HQ269389                | XM3560                    | CHN                      | 2009                  |
| CVA16B          | EU262658                | shzh05_1                  | CHN                      | 2005                  |
| CVA16B          | AY790926                | shzh00_1                  | CHN                      | 2000                  |
| CVA16B          | JX068831                | BJ11_11                   | CHN                      | 2011                  |
| CVA16B          | JX068828                | BJ11_12                   | CHN                      | 2012                  |
| CVA16B          | JQ034149                | SH_2009                   | CHN                      | 2010                  |
| CVA16B          | FJ198212                | GZ08                      | CHN                      | 2008                  |
| CVA16B          | HQ423141                | KMM                       | CHN                      | 2008                  |
| CVA16B          | GQ279368                | SZ_HK08_3                 | CHN                      | 2008                  |
| CVA16B          | GQ279371                | SZ_HK08_7                 | CHN                      | 2008                  |
| CVA16B          | JX068832                | BJ09_6                    | CHN                      | 2006                  |
| CVA16B          | JX068833                | BJ08_7                    | CHN                      | 2007                  |
| CVA16B          | JX481738                | BJCA08                    | CHN                      | 2008                  |
| CVA16B          | JX507808                | BJ1208                    | CHN                      | 2012                  |
| CVA16B          | JX839965                | Kor08                     | KOR                      | 2008                  |
| CVA16B          | JX986740                | Wuhan0109_HuB             | CHN                      | 2011                  |
| CVA16B          | JX986741                | Wuhan0157_HuB             | CHN                      | 2011                  |
| CVA16B          | JX986742                | Wuhan0127_HuB             | CHN                      | 2011                  |
| CVA16B          | KC117317                | GD09_24                   | CHN                      | 2009                  |
| CVA16B          | KC117318                | GD09_119                  | CHN                      | 2009                  |
| CVA16B          | KC342228                | G08                       | CHN                      | 2008                  |
| CVA16B          | KC507895                | YY157                     | CHN                      | 2010                  |
| CVA16B          | KF055238                | CC024                     | CHN                      | 2010                  |
| CVA16B          | KF055239                | changchun028              | CHN                      | 2010                  |
| CVA16B          | KF055240                | changchun029              | CHN                      | 2010                  |
| CVA16B          | KF055241                | CC045                     | CHN                      | 2010                  |
| CVA16B          | KF055242                | changchun075              | CHN                      | 2010                  |
| CVA16B          | KF055243                | CC090                     | CHN                      | 2010                  |
| CVA16B          | KF055244                | CC097                     | CHN                      | 2010                  |
| CVA16B          | KF055245                | CC163                     | CHN                      | 2010                  |
| CVA16B          | KF193620                | ZJ08_1                    | CHN                      | 2008                  |
| CVA16B          | KF193621                | SD09_5                    | CHN                      | 2009                  |
| CVA16B          | KF193622                | YN10_2                    | CHN                      | 2010                  |
| CVA16B          | KF193623                | HN11_3                    | CHN                      | 2011                  |
| CVA16B          | KF193624                | HN09_2                    | CHN                      | 2009                  |
| CVA16B          | KF193625                | GX10_1                    | CHN                      | 2010                  |
| CVA16B          | KF193626                | FJ10_3                    | CHN                      | 2010                  |
| CVA16B          | KF193627                | FJ09_2                    | CHN                      | 2009                  |
| CVA16B          | KF193628                | FJ09_1                    | CHN                      | 2009                  |
| CVA16B          | KF193629                | BJ10_3                    | CHN                      | 2010                  |
| CVA16B          | KF193630                | BJ10_1                    | CHN                      | 2010                  |
| CVA16B          | KF193631                | BJ10_2                    | CHN                      | 2010                  |
| CVA16B          | KF193632                | AH08_6                    | CHN                      | 2008                  |
| CVA16B          | JF738003                | THA_CA16_90               | THA                      | 2010                  |
| CVA16B          | JF738004                | THA_CA16_69               | THA                      | 2010                  |
| CVA16B          | JN590244                | G20                       | CHN                      | 2010                  |

|        |          |                      |     |      |
|--------|----------|----------------------|-----|------|
| CVA16B | JQ316639 | HQ09011181           | CHN | 2011 |
| CVA16B | JQ354992 | Ningbo_CHN_28_2_2009 | CHN | 2009 |
| CVA16B | JQ746660 | PM_33_7              | MYS | 2007 |
| CVA16B | JQ746661 | PM_12284_99          | MYS | 1999 |
| CVA16B | JQ746666 | PM_15765_0           | MYS | 2000 |
| CVA16B | JX068827 | TS10_7               | CHN | 2010 |
| CVA16B | JX068829 | TS10_8               | CHN | 2010 |
| CVA16B | JX068830 | BJ11_3               | CHN | 2011 |
| CVA16B | KC755228 | XZ10_D_1             | CHN | 2010 |
| CVA16B | KC755229 | ZJ10_73              | CHN | 2010 |
| CVA16B | KC755230 | AH10_2               | CHN | 2010 |
| CVA16B | KC755231 | AH10_12              | CHN | 2010 |
| CVA16B | KC755232 | NJ10_31              | CHN | 2010 |
| CVA16B | KC755233 | NJ10_75              | CHN | 2010 |
| CVA16B | KC755234 | XZ10_C_1             | CHN | 2010 |
| CVA16B | KC755235 | ZJ10_48              | CHN | 2010 |
| CVA16B | KF924762 | WIBP_P4_731          | CHN | 2010 |
| CVA16B | KF055238 | CC024                | CHN | 2010 |
| CVA16B | KF055239 | changchun028         | CHN | 2010 |
| CVA16B | KF055240 | changchun029         | CHN | 2010 |
| CVA16B | KF055241 | CC045                | CHN | 2010 |
| CVA16B | KF055242 | changchun075         | CHN | 2010 |
| CVA16B | KF055243 | CC090                | CHN | 2010 |
| CVA16B | KF055244 | CC097                | CHN | 2010 |
| CVA16B | KF055245 | CC163                | CHN | 2010 |
| CVA16B | KF991007 | DL16                 | CHN | 2012 |
| CVA16B | KJ746492 | L23                  | CHN | 2010 |
| CVA16B | KM215267 | SZ29_CHN_2014        | CHN | 2014 |
| CVA16B | KP266573 | 2008_43_7            | CHN | 2008 |
| CVA16B | JQ746662 | PM_12727             | MYS | 1999 |
| CVA16B | JQ746663 | PM_13884_97          | MYS | 1997 |
| CVA16B | JQ746664 | PM_13998_0           | MYS | 2000 |
| CVA16B | JQ746665 | PM_14660_97          | MYS | 1997 |
| CVA16B | JQ746667 | PM_15922_0           | MYS | 2000 |
| CVA16B | JQ746668 | PM_1651402_6         | MYS | 2006 |
| CVA16B | JQ746669 | PM_16809_98          | MYS | 1998 |
| CVA16B | JQ746670 | PM_16985_98          | MYS | 1998 |
| CVA16B | JQ746671 | PM_1791021_7         | MYS | 2007 |
| CVA16B | JQ746672 | PM_1795457_7         | MYS | 2007 |
| CVA16B | JQ746673 | PM_22159_2           | MYS | 2002 |
| CVA16B | JQ746674 | PM_22217_2           | MYS | 2002 |
| CVA16B | JQ746675 | PM_23208_2           | MYS | 2002 |
| CVA16B | JQ746676 | PM_31131_5           | MYS | 2005 |
| CVA16B | JQ746677 | PM_31376_5           | MYS | 2005 |
| CVA16B | JQ746678 | PM_35210_6           | MYS | 2006 |
| CVA16B | KM516102 | Wh16                 | CHN | 2010 |
| CVA16B | KP289411 | P10                  | CHN | 2013 |
| CVA16B | KP289412 | P1014                | CHN | 2013 |
| CVA16B | KP289413 | P187                 | CHN | 2013 |
| CVA16B | KP289414 | P255                 | CHN | 2013 |

|        |          |                   |     |      |
|--------|----------|-------------------|-----|------|
| CVA16B | KP289415 | P301              | CHN | 2013 |
| CVA16B | KP289416 | P83               | CHN | 2013 |
| CVA16B | KU854873 | CA16_193          | CHN | 2008 |
| CVA10A | AY421767 | Kowalik           | USA | 1950 |
| CVA10  | HQ728262 | SD                | CHN | 2009 |
| CVA10  | KJ641623 | CVA10_JB141310010 | CHN | 2013 |
| CVA10  | KP289394 | CV-A10_P1005      | CHN | 2013 |
| CVA10  | KP289395 | CV-A10_P118       | CHN | 2013 |
| CVA10  | KP289396 | CV-A10_P448       | CHN | 2013 |
| CVA10  | KP289397 | CV-A10_P460       | CHN | 2013 |
| CVA10  | KP289398 | CV-A10_P630       | CHN | 2013 |
| CVA10  | KP289399 | CV-A10_P638       | CHN | 2013 |
| CVA10  | KP289400 | CV-A10_P639       | CHN | 2013 |
| CVA10  | KP289401 | CV-A10_P670       | CHN | 2013 |
| CVA10  | KP289402 | CV-A10_P73        | CHN | 2013 |
| CVA10  | KP289403 | CV-A10_P737       | CHN | 2013 |
| CVA10  | KP289404 | CV-A10_P864       | CHN | 2013 |
| CVA10  | KP289405 | CV-A10_P866       | CHN | 2013 |
| CVA10  | KP289406 | CV-A10_P91        | CHN | 2013 |
| CVA10  | KP289407 | CV-A10_P911       | CHN | 2013 |
| CVA10  | KP289408 | CV-A10_P935       | CHN | 2013 |
| CVA10  | KP289409 | CV-A10_P962       | CHN | 2013 |
| CVA10  | KP289410 | CV-A10_P978       | CHN | 2013 |
| CVA10  | KP009574 | FY01_AH           | CHN | 2013 |
| CVA10  | KP009575 | FY02_AH           | CHN | 2013 |
| CVA10  | KP009576 | FY03_AH           | CHN | 2013 |
| CVA10  | KP009577 | FY04_AH           | CHN | 2013 |
| CVA10  | KP009578 | FY05_AH           | CHN | 2013 |
| CVA10  | KP009579 | FY06_AH           | CHN | 2013 |
| CVA10  | KP009580 | FY07_AH           | CHN | 2013 |
| CVA10  | KP009581 | FY08_AH           | CHN | 2013 |

Abbreviations used for country designation: CHN, China; KOR, South Korea; MYS, Malaysia; ZAF, South Africa; THA, Thailand; USA, United States of America.
